# Supplementary material for: Levels of polycyclic aromatic hydrocarbons around a scrap iron and steel recycling industry and the associated health risk assessment
Source: Royal Society of Chemistry journal article supplement (doi:10.1039/d5ra05266a), 2025-01-01
Supplement: d5ra05266a1.pdf [file d5ra05266a1.pdf]

### Targeted PAHs and their Structures

| Peak # | Compound Detected                    | Structures                                                                          |
|--------|--------------------------------------|-------------------------------------------------------------------------------------|
| 1      | Naphthalene (NAP)                    |    |
| 2      | <a href="#">Acenaphthylene</a> (ACY) |    |
| 3      | Acenaphthene (ACE)                   |    |
| 4      | Fluorene (FLU)                       |  |
| 5      | Phenanthrene (PHEN)                  |  |

|    |                                            |                                                                                     |
|----|--------------------------------------------|-------------------------------------------------------------------------------------|
| 6  | <a href="#">Pyrene</a> (PRY)               |    |
| 7  | <a href="#">Fluoranthene</a> (FLTH)        |    |
| 8  | <a href="#">Anthracene</a> (ANTH)          |    |
| 9  | Benzo[k]fluoranthene (B[k]F)               |  |
| 10 | <a href="#">Benzo[a]pyrene</a> (B[a]P)     |  |
| 11 | <a href="#">Chrysene</a> (CHRY)            |  |
| 12 | <a href="#">Benzo[a]anthracene</a> (B[a]A) |  |

|    |                                                          |                                                                                   |
|----|----------------------------------------------------------|-----------------------------------------------------------------------------------|
| 13 | <a href="#"><u>Indeno[1,2,3-cd]pyrene</u></a> (IND)      |  |
| 14 | <a href="#"><u>Benzo[b]fluoranthene</u></a> (B[b]F)      |  |
| 15 | <a href="#"><u>Dibenzo[a,h]anthracene</u></a> ((D[ah]A)) |  |
| 16 | Benzo[g,h,i]perylene (B[ghi]P)                           |  |
